# Supplementary material for: Folic acid grafted amphiphilic dextran-b-poly(ε-benzyloxycarbonyl-L-lysine) micelles for drug’s pH-responsive release
Source: Research Square preprint supplement (doi:10.21203/rs.3.rs-7201841/v1), 2025-09-02
Supplement: Supplementary file 1 [file 843515c602a04519c9107f96.docx]

**Supporting Information**

Folic acid grafted amphiphilic dextran-b-poly(ε-benzyloxycarbonyl- l-lysine) micelles for drug’s pH-responsive release

Ruoxi Huang, Yaxin Yi, Shiyu Zhang, Jiaxin Wang, Haikuan Yuan, Jie Lu*

*College of Chemistry and Chemical Engineering, Shanghai University of Engineering Science, Shanghai 201620, China*

* Corresponding author: 333 Long Teng Road, Shanghai 201620, China. Tel.: +86 21 67791216; fax: +86 21 67791214. E-mail address: lujie@sues.edu.cn.

**Table S1****.** Molecular weight of block copolymers Dex-b-PZLL.

| block copolymers | *M*n | *M*w | *M*w/*M*n |
| --- | --- | --- | --- |
| Dex-b-PZLL10 | 11281 | 13650 | 1.21 |
| Dex-b-PZLL20 | 14217 | 16634 | 1.17 |
| Dex-b-PZLL30 | 17215 | 20309 | 1.18 |


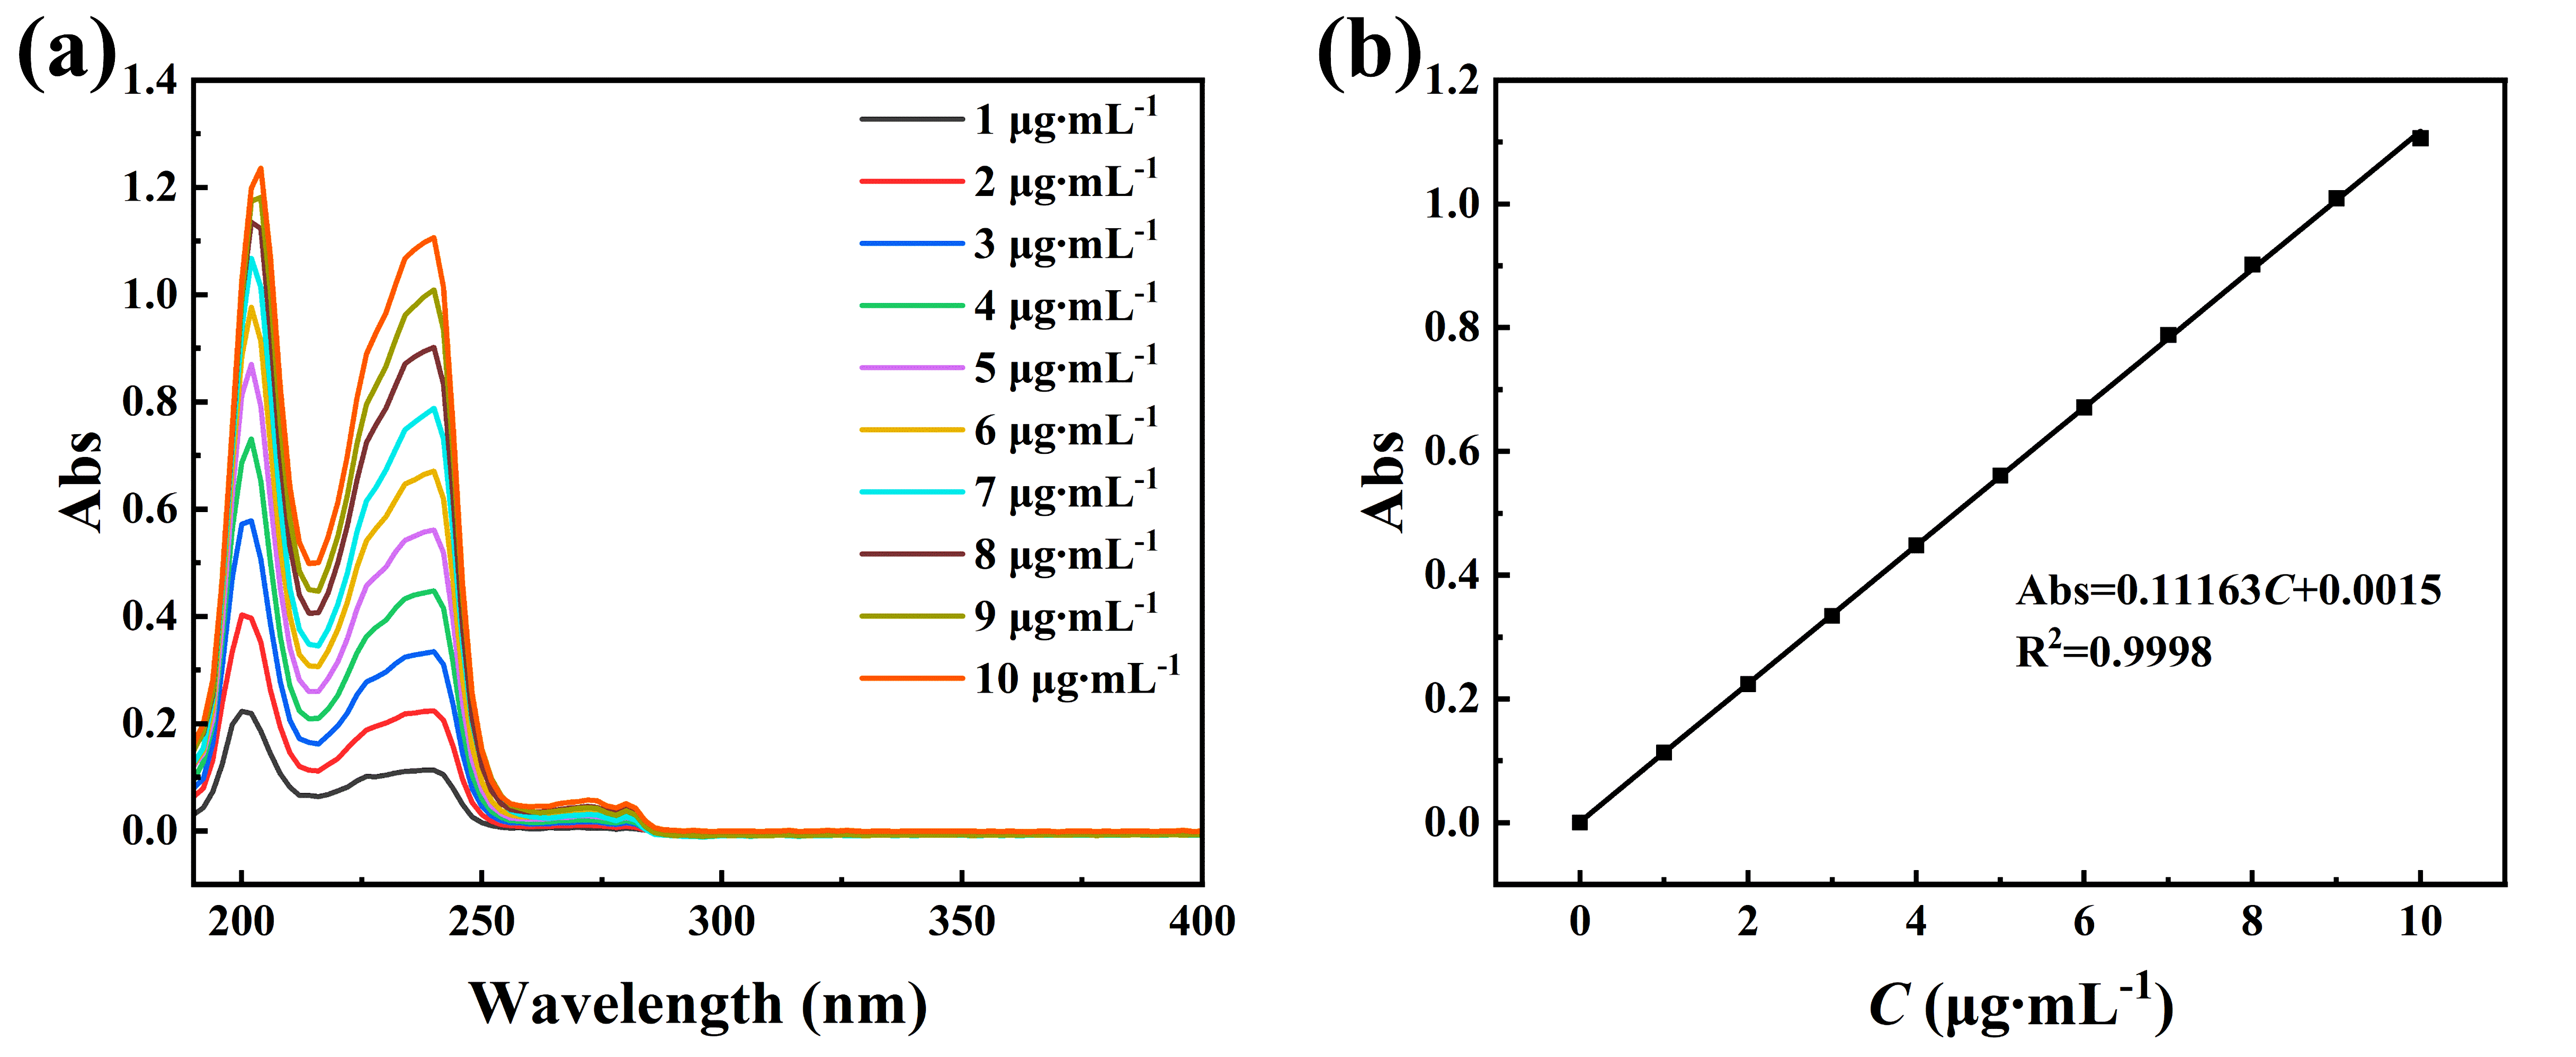


**Fig. S1.** UV-vis absorption spectra of letrozole at different concentrations (a) and standard curve of letrozole (b).


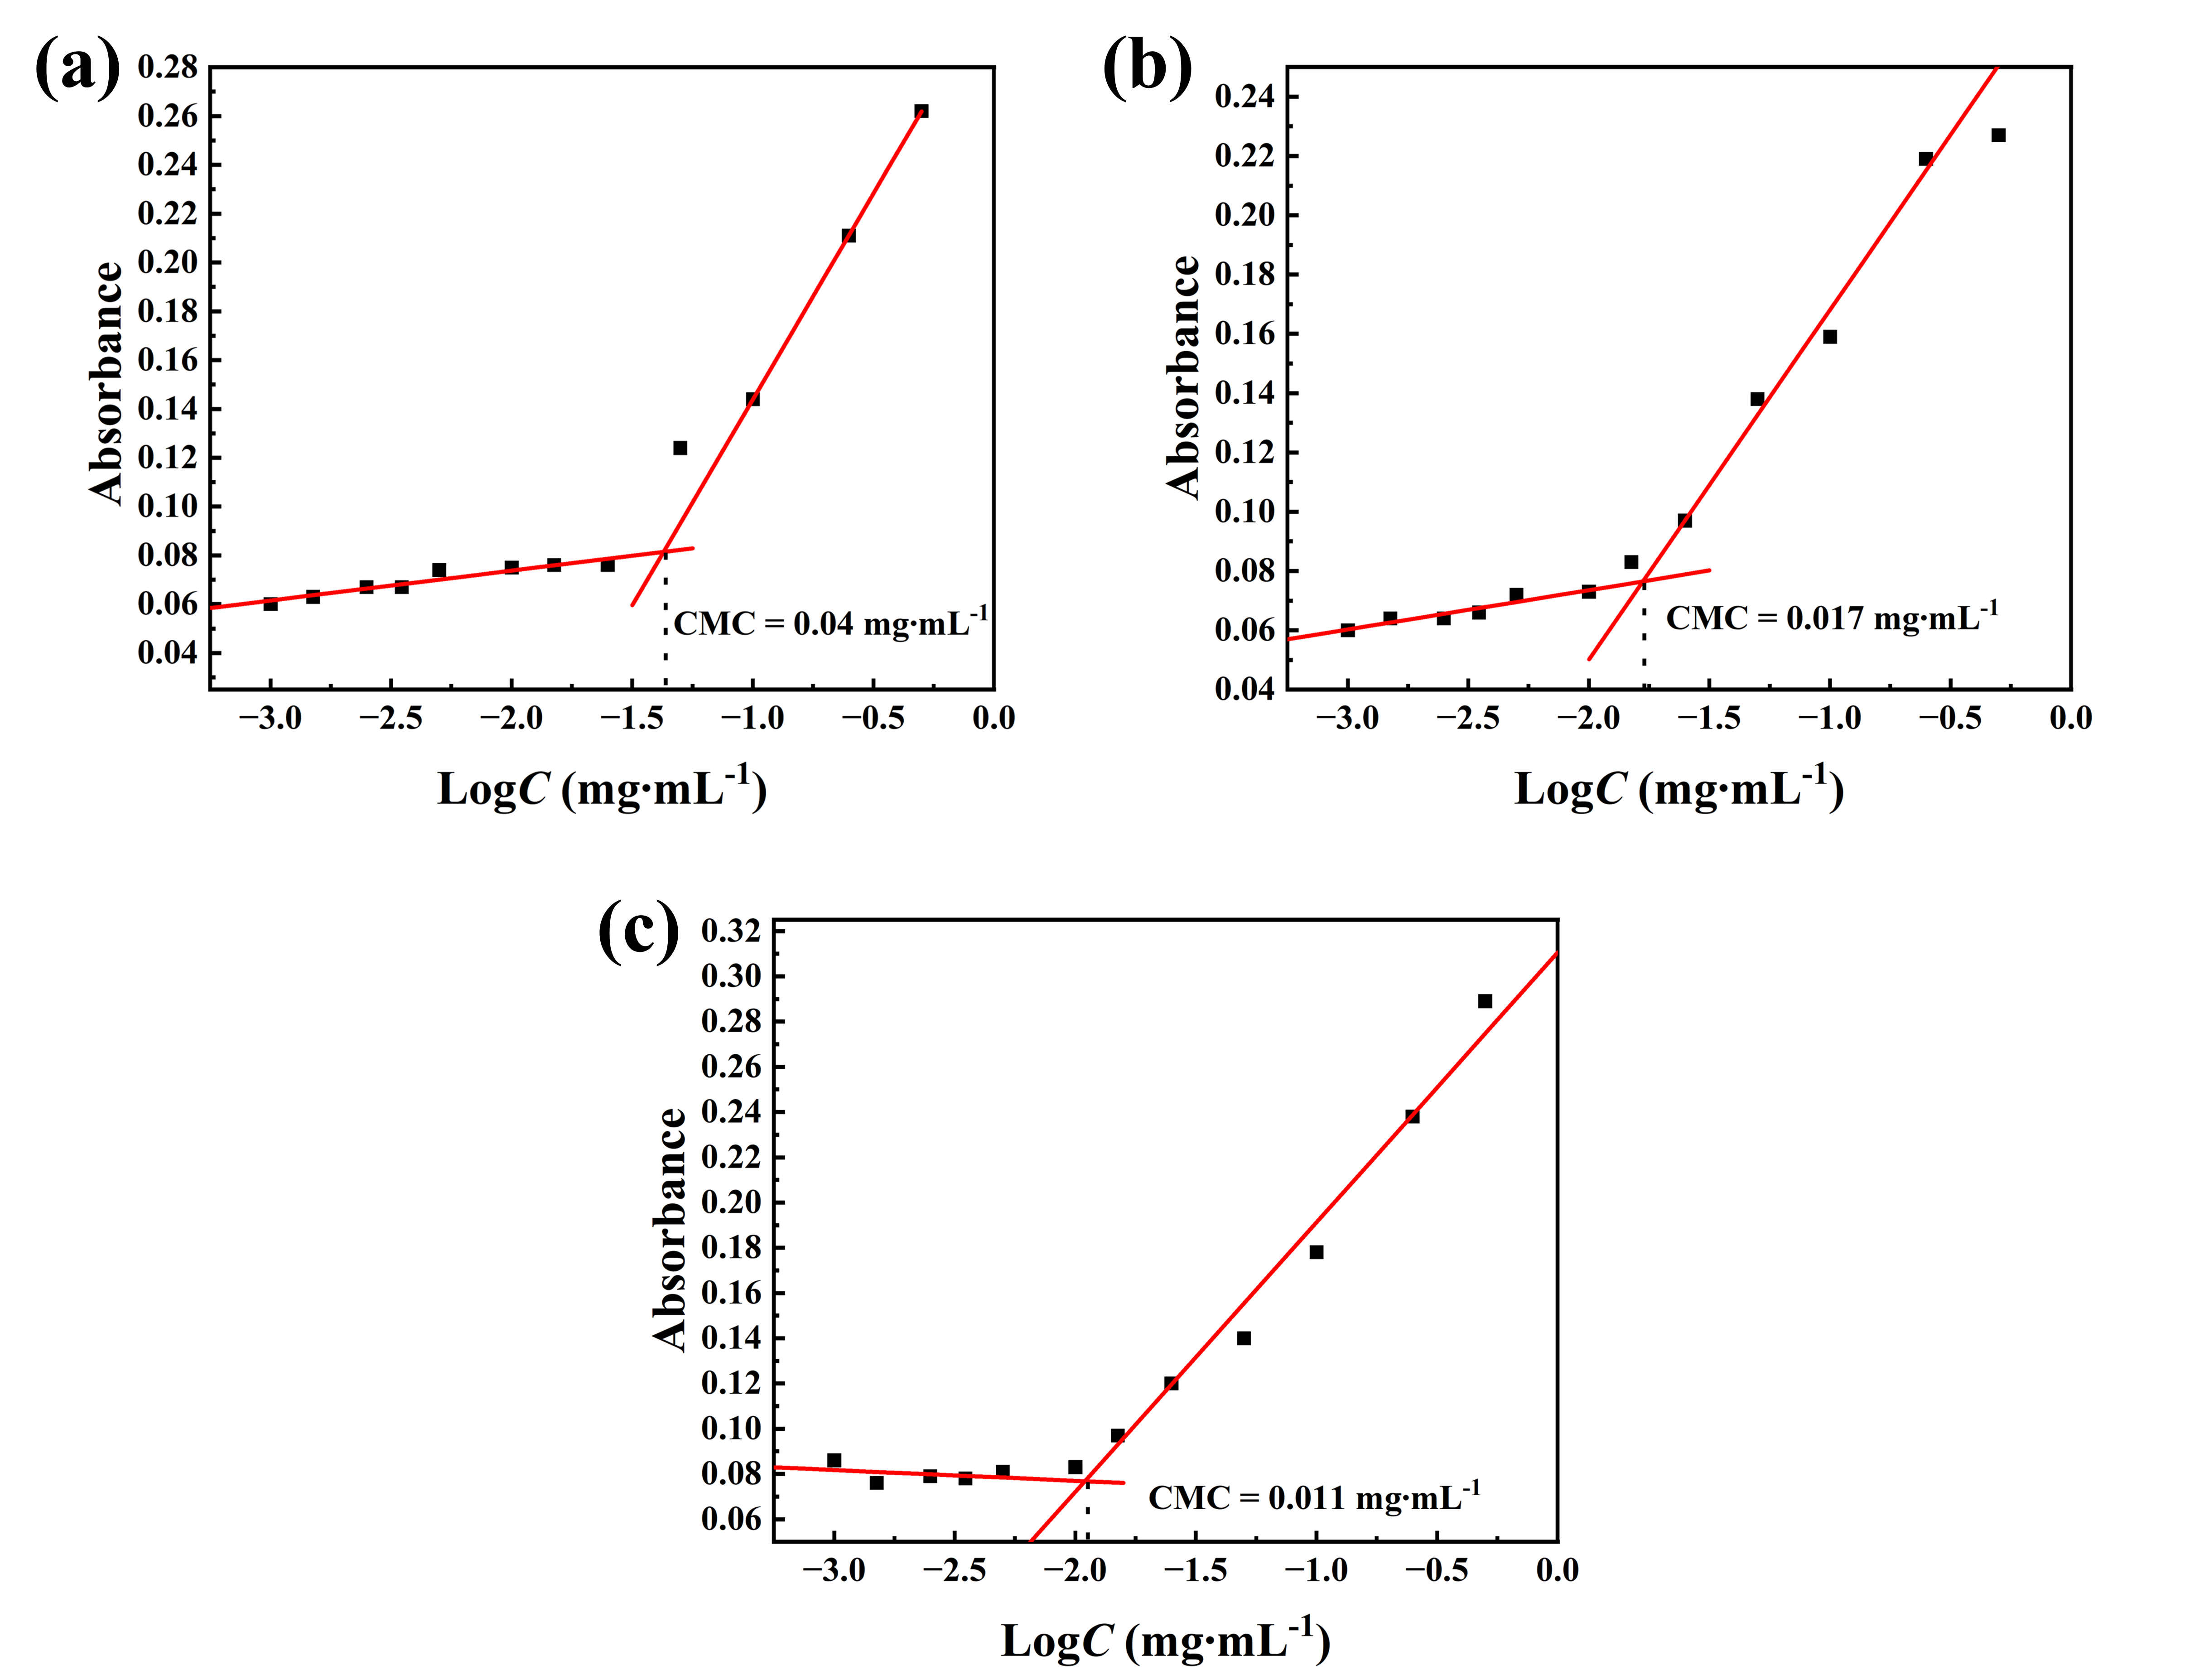


**Fig. S2.** Variations of the absorbance of DPH at 350 nm with the copolymer concentration of FDP-1 (a), FDP-2 (b) and FDP-3 (c). The values of CMC denote the critical micelle concentration in aqueous medium.


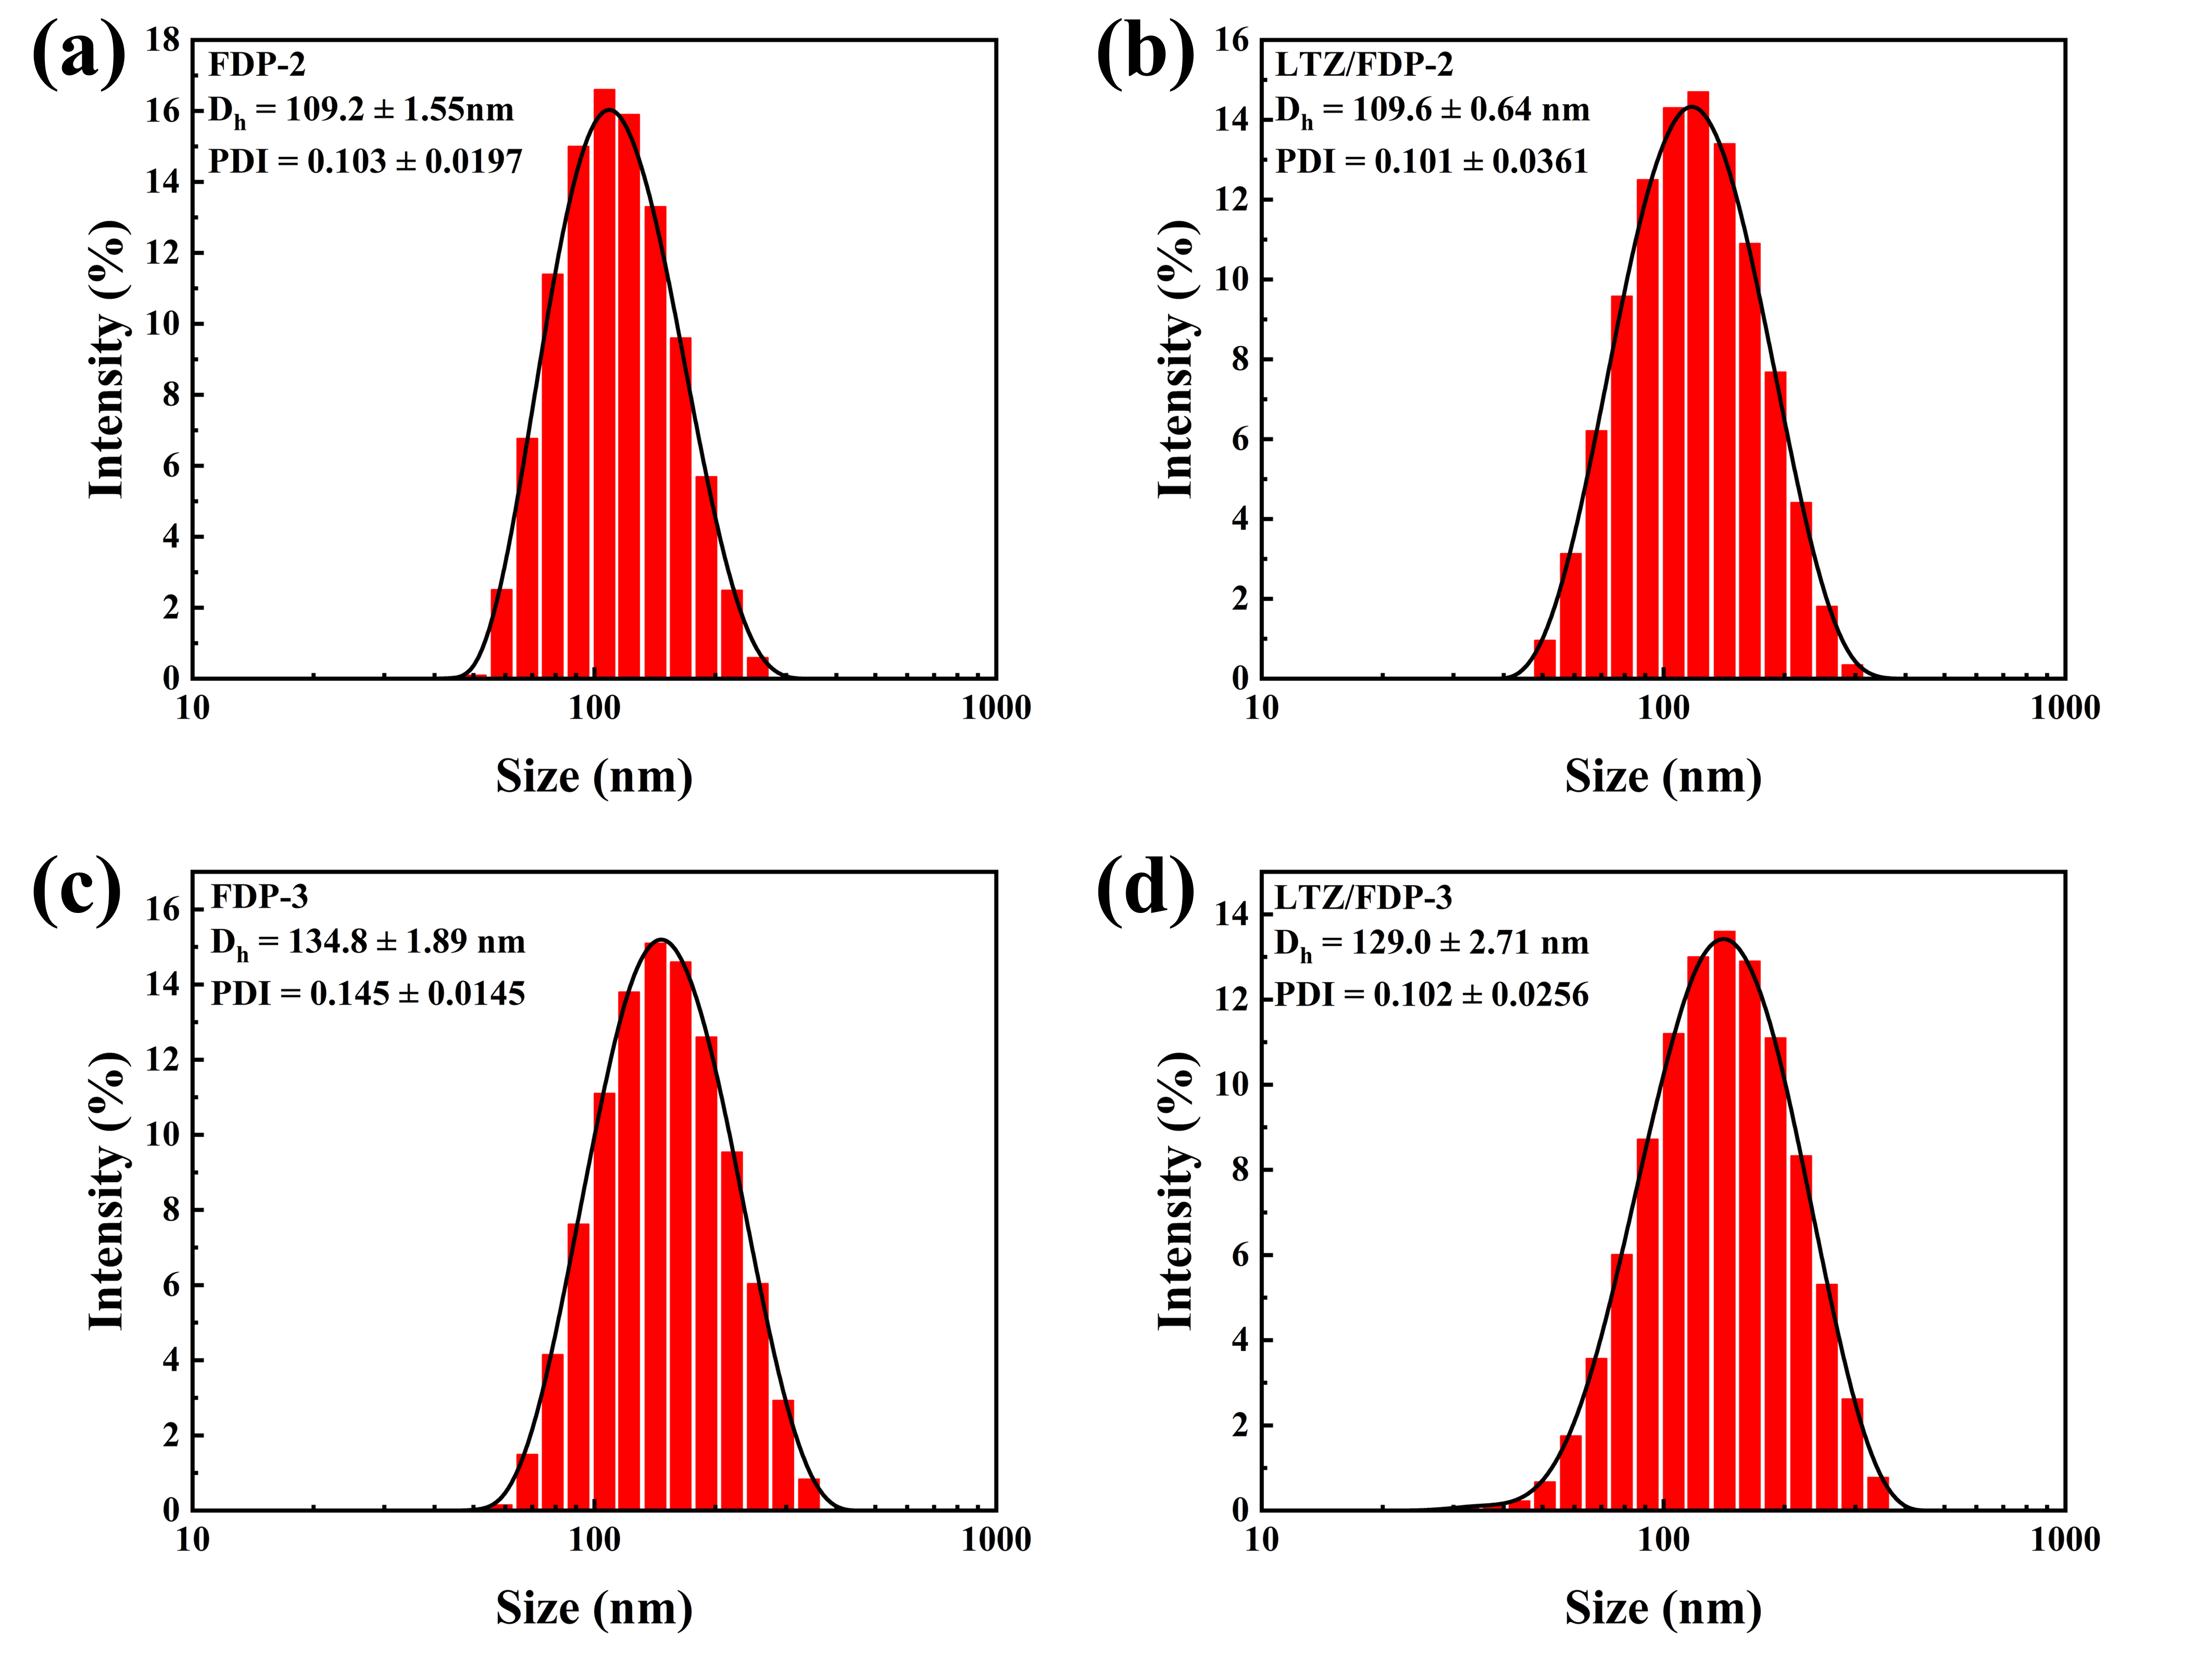


**Fig. S3.** Particle size distribution of blank micelles FDP-2 (a), FDP-3 (c) and drug-loaded micelles LTZ/FDP-2 (b), LTZ/FDP-3 (d).
